# Supplementary material for: Hierarchical zinc oxide nano-tips and micro-rods: hydrothermal synthesis and improved chemi-resistive response towards ethanol
Source: Royal Society of Chemistry journal article supplement (doi:10.1039/c5ra23203a), 2015-12-17
Supplement: c5ra23203a1.pdf [file c5ra23203a1.pdf]

**Electronic Supplementary Information (ESI)**

**Hierarchical zinc oxide nano-tips and micro-rod: Hydrothermal synthesis and improved chemi-resistive response towards ethanol**

**P. Das<sup>a,b</sup>, B. Mondal<sup>a,b</sup>, K. Mukherjee<sup>a\*</sup>**

<sup>a</sup>Centre for Advanced Materials Processing, CSIR-Central Mechanical Engineering Research Institute, Durgapur-713209, India

<sup>b</sup>Academy of Scientific and Innovative Research, CSIR-Central Mechanical Engineering Research Institute, Durgapur-713209, India

\*Corresponding Author, Email: [kalisadhanm@yahoo.com](mailto:kalisadhanm@yahoo.com); [k\\_mukherjee@cmeri.res.in](mailto:k_mukherjee@cmeri.res.in)

FTIR

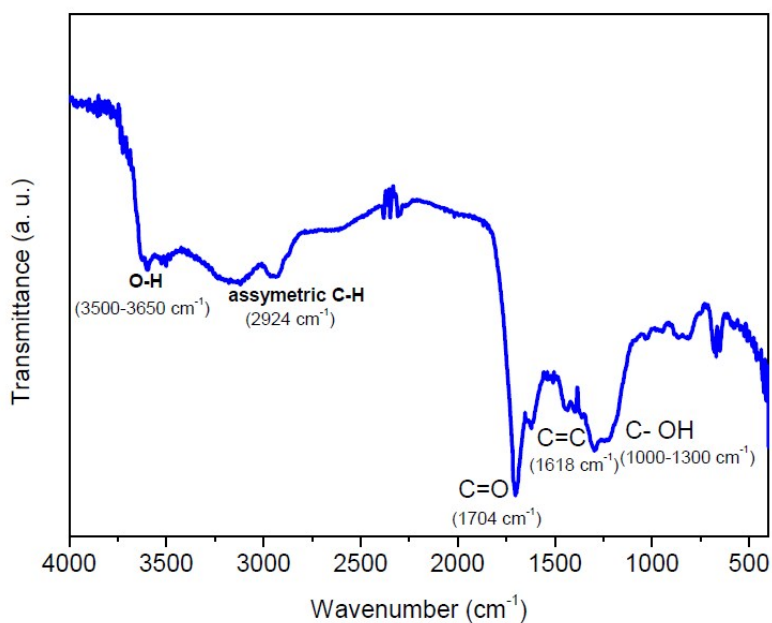

**Figure S1:**  
spectrum of

hydrothermally prepared spherical carbon template

**Description:** The formation of the carbon spheres involves the dehydration and subsequent carbonization of dextrose. Due to non- or just partially dehydrated dextrose, the surface of the spheres contains OH and C=O groups.<sup>[1]</sup> As shown in the Figure, the broad band at 3500-3650 cm<sup>-1</sup> is attributed to O-H (hydroxyl) vibration. The band at 2924 cm<sup>-1</sup> is due to asymmetric C-H stretching of aliphatic groups. C-OH stretching and bending vibration are observed at 1000-1300 cm<sup>-1</sup>. The bands at 1,704 and 1,618 cm<sup>-1</sup> are attributed to C=O vibration and in-plane C=C stretching vibration of aromatic ring respectively.<sup>[1-2]</sup>

1. X. Sun, Y. Li, Colloidal carbon spheres and their core/shell structures with noble-metal nanoparticles, *Angew. Chem. Int. Ed.* 43 (2004) 597-601.
2. Y. Z. Jin, C. Gao, W. K. Hsu, Y. Zhu, A. Huczko, M. Bystrzejewski, M. Roe, C. Y. Lee, S. Acquah, H. Kroto, David R.M. Walton, Large-scale synthesis and characterization of carbon spheres prepared by direct pyrolysis of hydrocarbons, *Carbon* 43 (2005) 1944-1953.

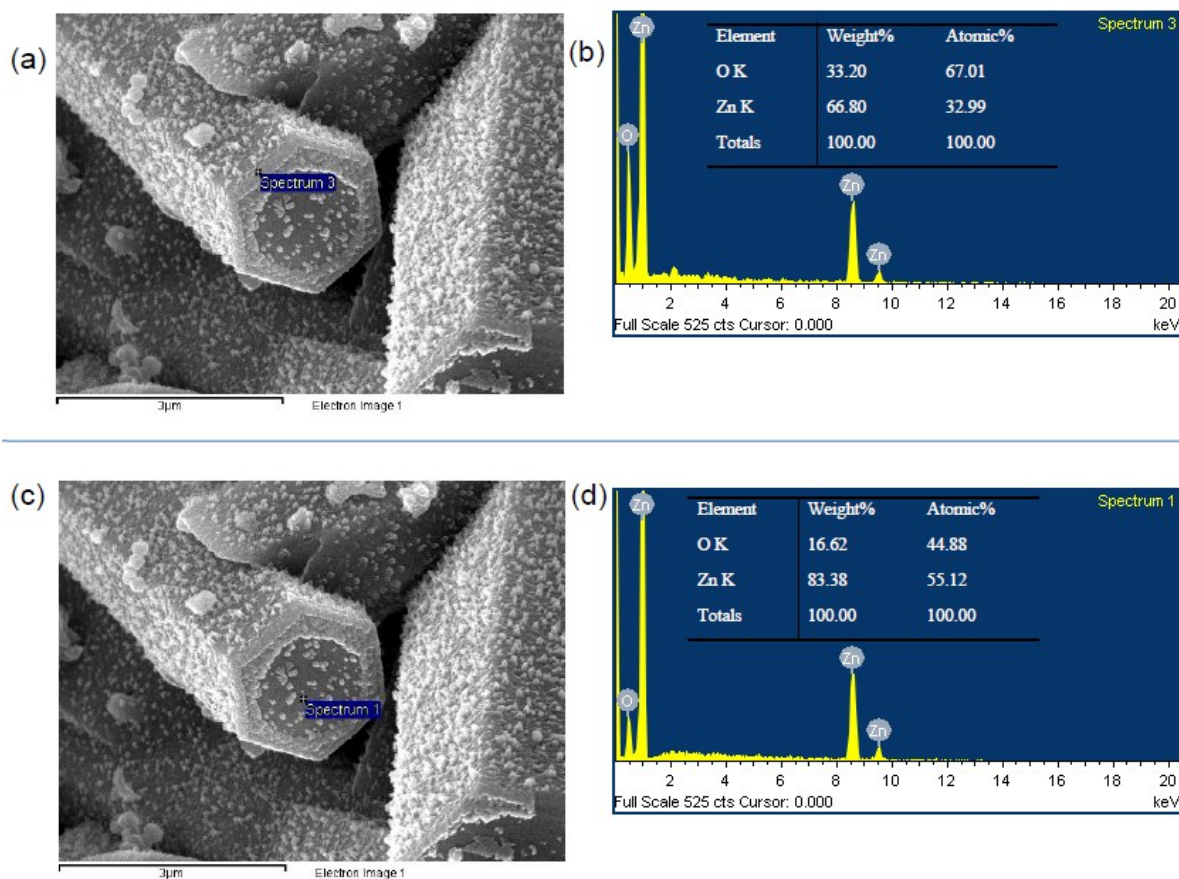

**Figure S2:** (a) Point scanning on ZnO nano-tips and (b) corresponding EDS spectrum; inset table summarizes the weight and atomic % of Zn and O obtained from EDS spectrum of ZnO nano-tips (c) Point scanning on ZnO micro-rod and (d) corresponding EDS spectrum; inset table summarizes the weight and atomic % of Zn and O obtained from EDS spectrum of ZnO micro-rod.

**Description:** The compositions of the nano-tips as well as micro-rod are separately studied using the energy dispersive X-ray spectroscopy (EDS) facility associated with the FESEM instrument. Compositional analyses using point scanning mode exhibit that the zinc (Zn) and oxygen (O) ratio is higher for micro-rod than nano-tips which further supports that the crystallinity of the micro-rod is better than the nano-tips.

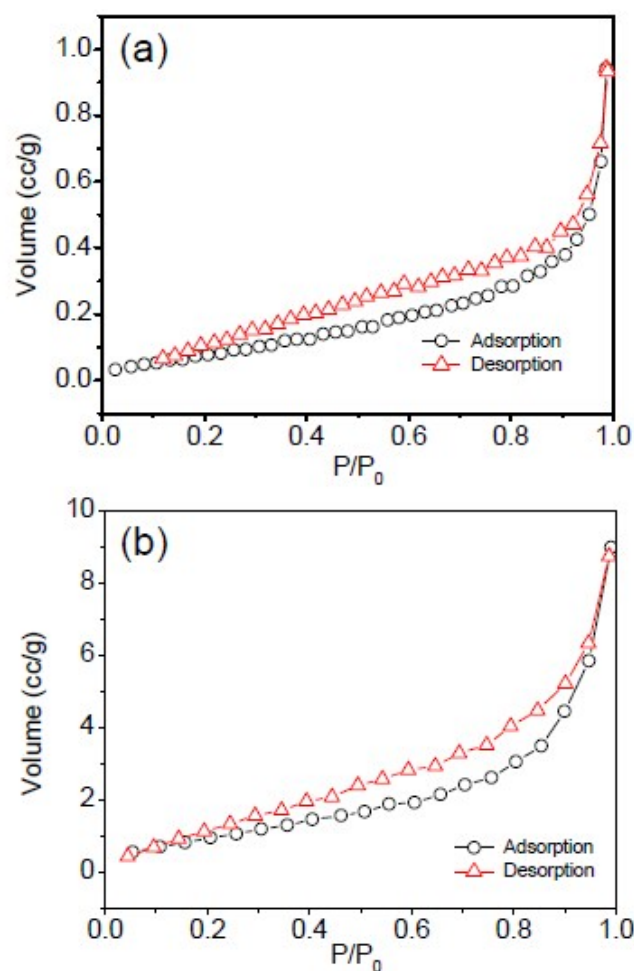

**Figure S3:**  $N_2$  adsorption-desorption isotherms of (a) A-I and (b) A-II derived ZnO products

**Description:** The surface area of the products derived from A-I and A-II are estimated from the  $N_2$  adsorption-desorption isotherm shown in the figure. The estimated surface area of product derived from A-II ( $7.2 \text{ m}^2 \text{ g}^{-1}$ ) is found considerably higher than the product derived from A-I ( $3.9 \text{ m}^2 \text{ g}^{-1}$ ).

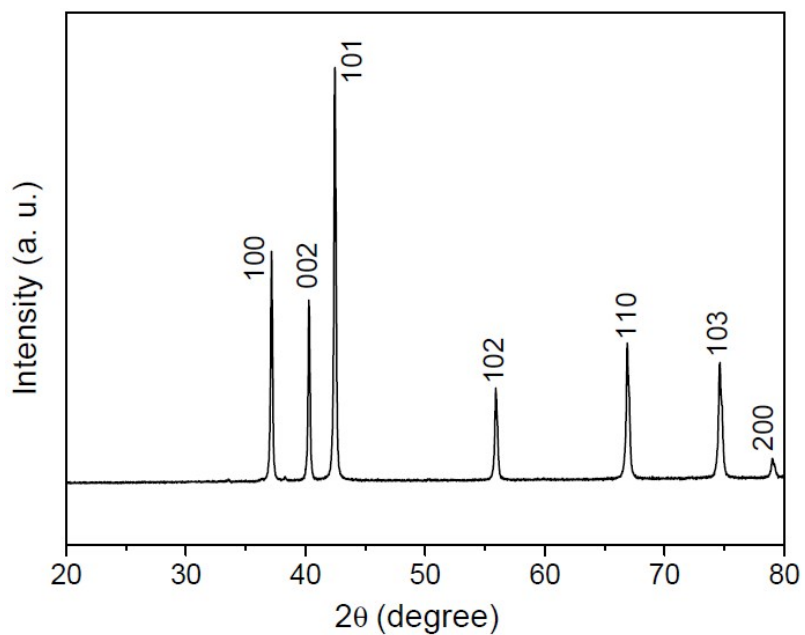

Figure S4: XRD pattern of prepared hierarchical ZnO

**Description:** Figure S4 represents the X-ray diffraction pattern of ZnO hierarchical structure. The XRD pattern is in good agreement with the JCPDS Card No. 03-0888. The XRD pattern recorded under CoK $\alpha$  radiation (PW 3040/60, Panalytical, Netherland).
